# Supplementary material for: Modeling Causality for Pairs of Phenotypes in System Genetics
Source: Oxford University Press journal article supplement (doi:10.1534/genetics.112.147124), 2013-01-04
Supplement: figures1.pdf [file figures1.pdf]

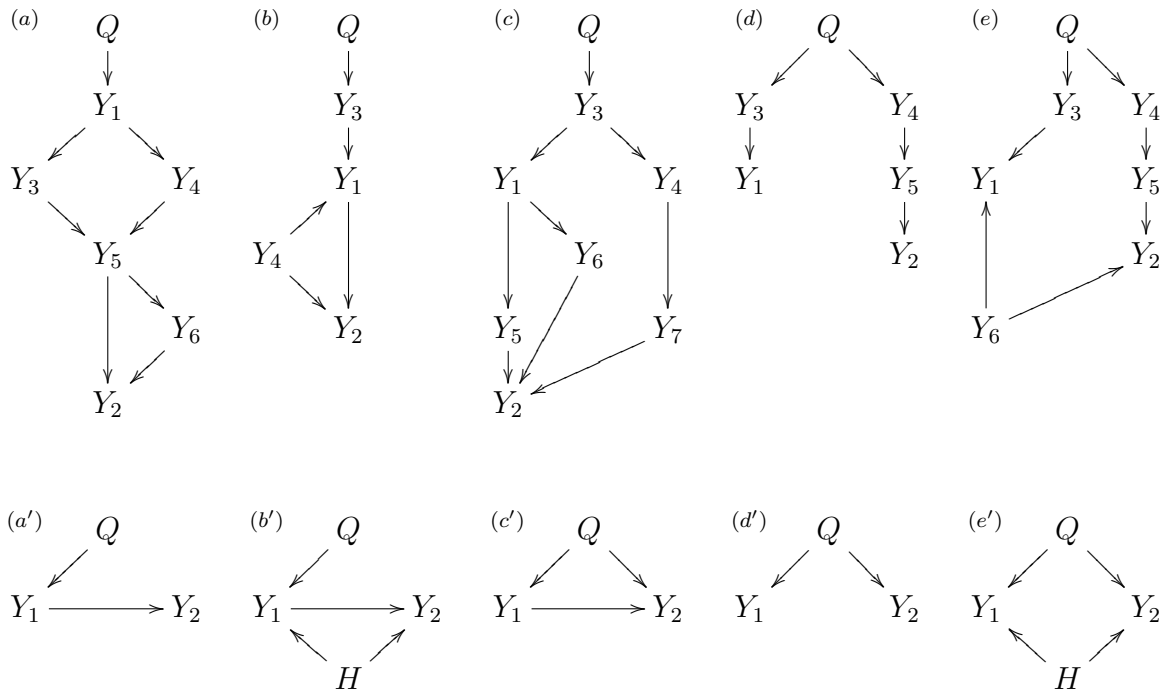

**Figure S 1** Network models and their collapsed versions. The collapsed networks (bottom panels) represent simplified versions of the true networks (top panels), where nodes other than  $Q, Y_1$  and  $Y_2$  are ignored, even though they still represent the correct causal flow among these three nodes in the true network. Consider, for example, network  $c$  and its collapsed version  $c'$ . The path  $Q \rightarrow Y_3 \rightarrow Y_1$  in  $c$  is collapsed to  $Q \rightarrow Y_1$  in  $c'$ . The paths  $Y_1 \rightarrow Y_5 \rightarrow Y_2$  and  $Y_1 \rightarrow Y_6 \rightarrow Y_2$  in  $c$  are collapsed to  $Y_1 \rightarrow Y_2$  in  $c'$ . The path  $Q \rightarrow Y_3 \rightarrow Y_4 \rightarrow Y_7 \rightarrow Y_2$  in  $c$  is collapsed to  $Q \rightarrow Y_2$  in  $c'$ .
