# Supplementary material for: Modeling Causality for Pairs of Phenotypes in System Genetics
Source: Oxford University Press journal article supplement (doi:10.1534/genetics.112.147124), 2013-01-04
Supplement: figures10.pdf [file figures10.pdf]

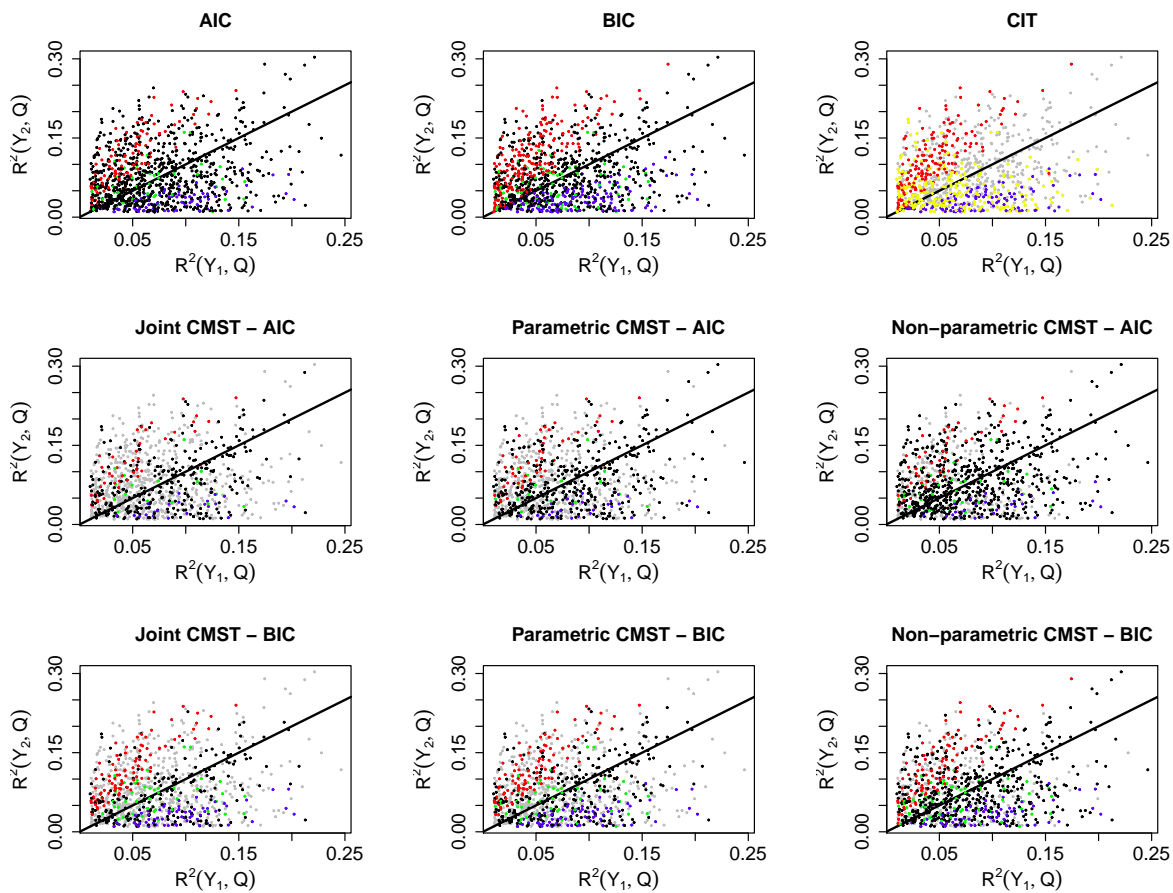

**Figure S10** Simulation results for Model C in Figure 2 and sample size 1,000. Blue, red, green and black dots represent, respectively,  $M_1$ ,  $M_2$ ,  $M_3$  and  $M_4$  calls. Yellow dots (CIT plot only) represent  $M_i$  calls. Grey dots show the “no calls”. Results were computed using significance level 0.05. For the AIC, BIC and CMST methods, black dots represent true positives, and blue, red and green dots represent false positives. For the CIT test, yellow dots represent true positives and blue and red dots show false positives.
