# Supplementary material for: Modeling Causality for Pairs of Phenotypes in System Genetics
Source: Oxford University Press journal article supplement (doi:10.1534/genetics.112.147124), 2013-01-04
Supplement: figures13.pdf [file figures13.pdf]

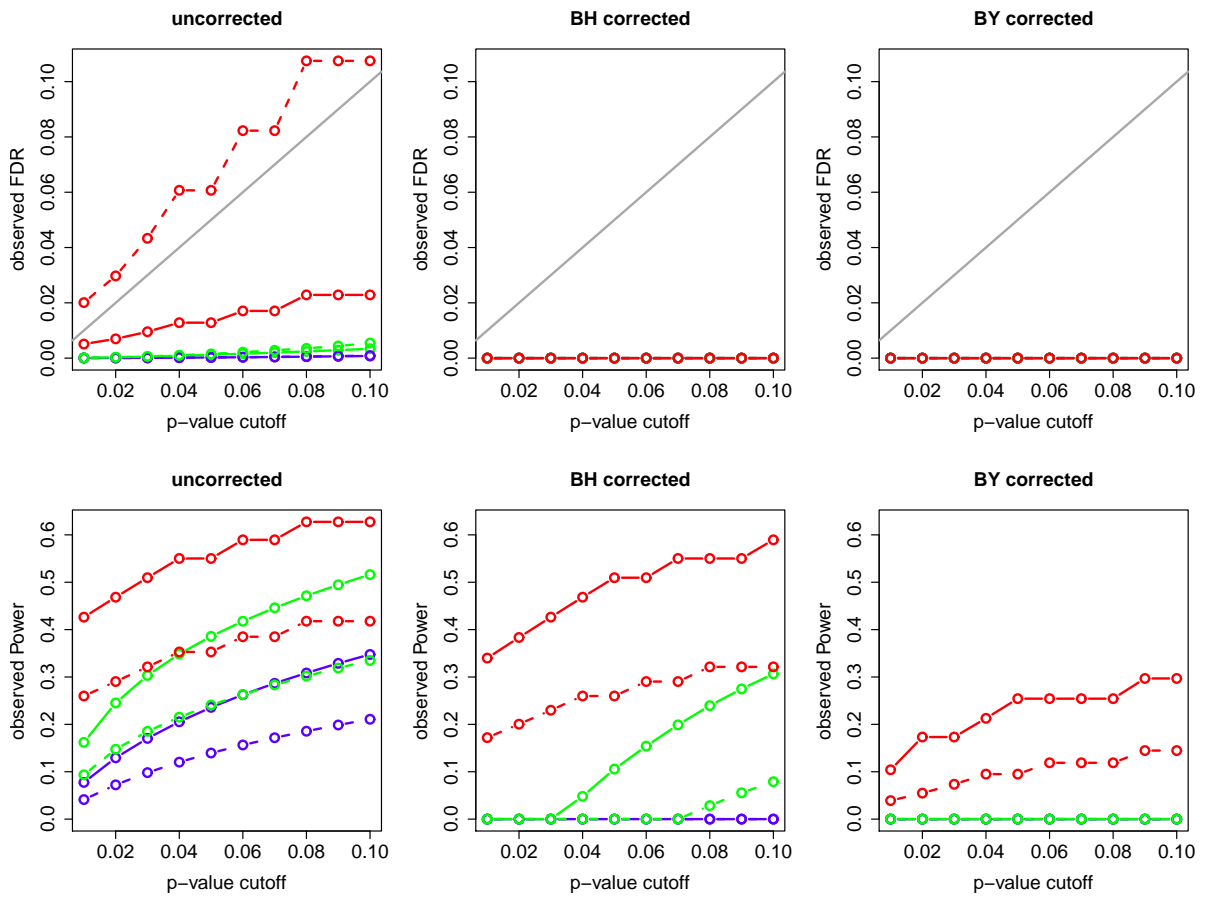

**Figure S13** Observed FDR and power for the simulations based on model  $F$ . The x-axis represents the p-value cutoffs used for computing the results. Dashed and full curves represent, respectively, AIC- and BIC-based methods. Green: parametric CMST. Red: non-parametric CMST. Blue: joint-parametric CMST. Black: AIC and BIC. The grey line in the top panels corresponds to the  $\alpha$  levels.
