# Supplementary material for: Modeling Causality for Pairs of Phenotypes in System Genetics
Source: Oxford University Press journal article supplement (doi:10.1534/genetics.112.147124), 2013-01-04
Supplement: figures15.pdf [file figures15.pdf]

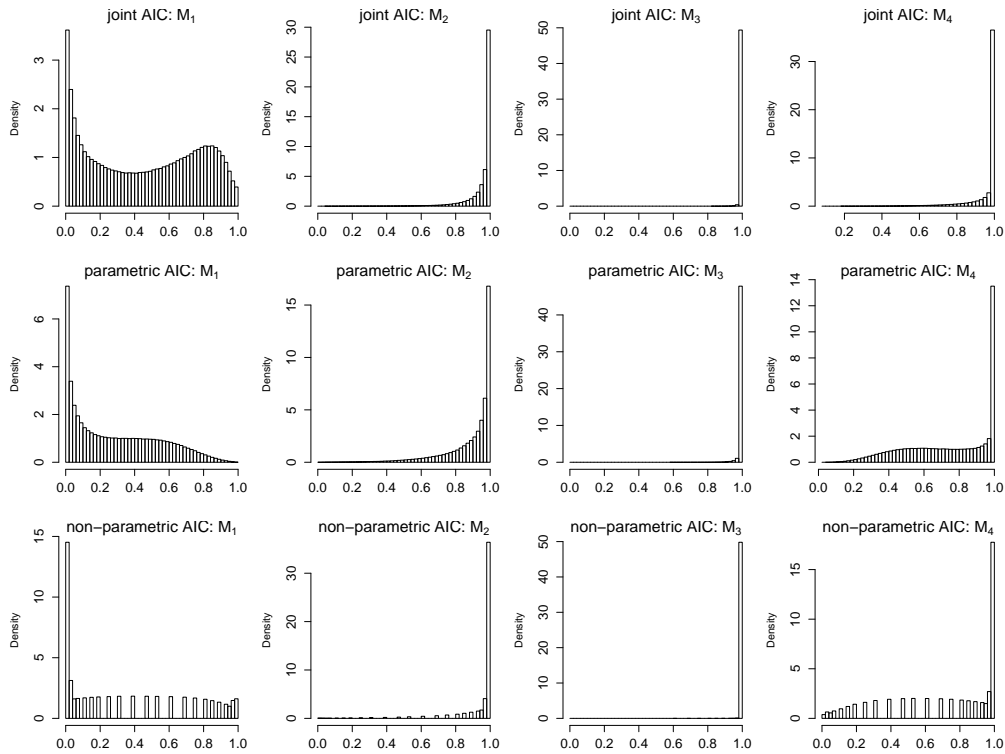

**Figure S15** Uncorrected p-value distributions for the AIC-based CMST tests with data simulated from model  $F$  in Figure 5. Results based on 1,656,261 tests. For these simulations, the  $M_1$  call is the correct one, hence the skewed distribution towards small p-values at the left panels. The skewness towards larger p-values for the  $M_2$ ,  $M_3$ , and  $M_4$  calls follows from the fact that whenever a p-value for one model is smaller than  $\alpha$ , then the p-values for the other three models are greater than  $1 - \alpha$ . Note the larger frequency of small  $M_1$  p-values for the non-parametric CMST test (bottom left panel - the discrete nature of the histogram is a consequence of the test statistic being discrete for the non-parametric test).
