# Supplementary material for: Modeling Causality for Pairs of Phenotypes in System Genetics
Source: Oxford University Press journal article supplement (doi:10.1534/genetics.112.147124), 2013-01-04
Supplement: files2.pdf [file files2.pdf]

## **File S2**

### **Simulation studies**

Here we provide further details on the simulation studies presented in the main text.
